# Supplementary material
Source: MDPI journal article supplement (https://www.mdpi.com/search?q=ijerph-17-02759)
Supplement: s001 [file ijerph-17-02759-s001.pdf]

SURNAME AND NAME

SCHOOL

GRADE

**FOOD LABORATORY**  
**MODULE 1 – BODY WEIGHT AND FOODS**

|                            |                                                                                                                                                                                                                                                          |
|----------------------------|----------------------------------------------------------------------------------------------------------------------------------------------------------------------------------------------------------------------------------------------------------|
| <b>General objective</b>   | Understand the meaning of overweight/obesity and their main determinants                                                                                                                                                                                 |
| <b>Specific objectives</b> | <ul style="list-style-type: none"><li>- Know the meaning of overweight/obesity</li><li>- Discriminate between figures of different body weight</li><li>- Identify the main determinants of overweight and obesity</li></ul>                              |
| <b>Short introduction</b>  | Body weight and its classification. The relationship between food intake and obesity.                                                                                                                                                                    |
| <b>Activity 1</b>          | Prepare some profiles of children with different weight (under, normal, over weight/obese) and ask children to observe them.<br>Ask them which profile they think is associated to health, and ask them to tick the correct smile close to each profile. |
| <b>Activity 2</b>          | Prepare a sheet with one profile of obese child and an empty space beside.<br>Ask pupils to draw and paint on a blank sheet of paper a food that they link to the obese child, cut out and paste in the empty space beside the correct profile.          |

**EVALUATION**

|                                                                                                                         |                                                                                                                                                                         |  |                                                                                                                                                             |       |  |
|-------------------------------------------------------------------------------------------------------------------------|-------------------------------------------------------------------------------------------------------------------------------------------------------------------------|--|-------------------------------------------------------------------------------------------------------------------------------------------------------------|-------|--|
| <p>Tick the smile corresponding correctly to the profile.<br/>Score = 1 point per each profile correctly perceived.</p> |                                                                                                                                                                         |  | <p>Paste the drawn and painted food that you link to the obese profile.<br/>Score = 1 point if the drawing is correct in relation to the obese profile.</p> |       |  |
|                                      |   |  |                                                                          |       |  |
|                                      |   |  |                                                                                                                                                             |       |  |
|                                      |   |  |                                                                                                                                                             |       |  |
| SCORE                                                                                                                   |                                                                                                                                                                         |  |                                                                                                                                                             | SCORE |  |

**TOTAL SCORE**

SURNAME AND NAME

SCHOOL

GRADE

**FOOD LABORATORY**  
**MODULE 2 – FOOD QUALITY/QUANTITY AND HEALTH**

|                            |                                                                                                                                                                                                                                                                                                                                                                                                                                                               |
|----------------------------|---------------------------------------------------------------------------------------------------------------------------------------------------------------------------------------------------------------------------------------------------------------------------------------------------------------------------------------------------------------------------------------------------------------------------------------------------------------|
| <b>General objective</b>   | Understand the relationship between the food quality/quantity and health.                                                                                                                                                                                                                                                                                                                                                                                     |
| <b>Specific objectives</b> | - Recognise and name the healthy and the non-health foods.<br>- Experience the weighing of some foods, and discriminate between the different quantities.                                                                                                                                                                                                                                                                                                     |
| <b>Short introduction</b>  | The main classes of foods. Healthy and non-healthy foods. Correct quality and quantity of the foods in the diet.                                                                                                                                                                                                                                                                                                                                              |
| <b>Activity 1</b>          | Prepare a sheet with different healthy and less or non-healthy foods.<br>Ask pupils to choose two foods, one healthy and one non-healthy, and draw, paint and cut out them on a blank sheet.<br>Ask pupils to paste the two chosen foods on the empty space of the sheet beside the correct smile (healthy=happy smile; non-healthy=sad smile).                                                                                                               |
| <b>Activity</b>            | Take some foods (fruit, pasta, etc.) and make some example of small, medium and big portion sizes.<br>Ask children to weigh the foods, and ask them if the portions are small, medium or big.<br>Ask children to draw, paint and cut out two portions of food on a blank sheet, one medium and one big.<br>Ask pupils to paste the two portions on the empty space of the sheet beside the correct smile (medium portion=happy smile; big portion=sad smile). |
| <b>Activity 3</b>          | Ask children to associate to some foods the colour of health (yellow, orange, red from the fruit and vegetables) and to other the colour white (sugar, butter, etc.)<br>Ask them to draw and paint these foods.                                                                                                                                                                                                                                               |

**EVALUATION**

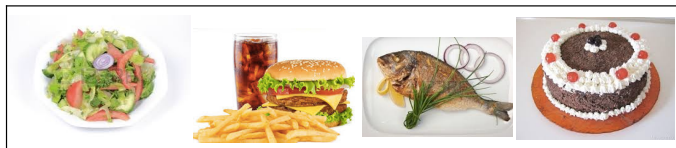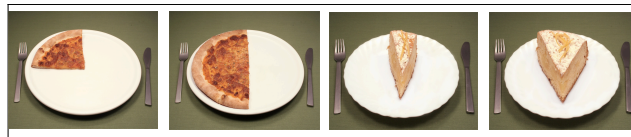

Paste two foods, one healthY and one non healthy in the empty space beside the correct smile.

Score = 1 point per each food pasted in the correct space.

|       |  |  |
|-------|--|--|
|       |  |  |
|       |  |  |
| SCORE |  |  |

Paste two portions, one correct and one non correct corresponding to the smile.

Score = 1 point per each portion pasted in the correct space.

|       |  |  |
|-------|--|--|
|       |  |  |
|       |  |  |
| SCORE |  |  |

**TOTAL SCORE**

SURNAME AND NAME

SCHOOL

GRADE

FOOD LABORATORY  
MODULE 3 – EAT ORGANIC AND FOLLOW SEASONS!

|                     |                                                                                                                                                                                                                                                                                                                                     |
|---------------------|-------------------------------------------------------------------------------------------------------------------------------------------------------------------------------------------------------------------------------------------------------------------------------------------------------------------------------------|
| General objective   | Understand the relationship between food and environment (organic food, seasonality)                                                                                                                                                                                                                                                |
| Specific objectives | Know the meaning of organic food; recognise packed organic foods. Identify foods from each season.                                                                                                                                                                                                                                  |
| Short introduction  | Organic foods: definition; advantages for the environment and health; European logo for packed foods. Seasons and their foods.                                                                                                                                                                                                      |
| Activity 1          | Show to the children some packed organic products and non-organic products.<br>Prepare some sheets with the images of these foods. Ask them to cut them out and paste on a sheet gathering them to compose a meal.<br>If they will have composed a meal by choosing all the organic foods, they will have given the correct answer. |
| Activity 2          | Show to the children fruit and vegetables typical from each season.<br>Ask them to compose a meal by adding foods from the winter season.                                                                                                                                                                                           |

EVALUATION

Compose a meal by choosing foods among those shown organic and non-organic.  
Score = 1 point if they choose all organic foods.



SCORE

Compose a meal by choosing foods among those shown fresh from the garden and packed.  
Score = 1 point if they choose foods fresh from the garden.



SCORE

Compose a “winter meal” by choosing foods among those shown.  
Score = 1 point if they choose winter foods.



SCORE

Compose a “summer meal” by choosing foods among those shown.  
Score = 1 point if they choose summer foods.



SCORE

TOTAL SCORE

SURNAME AND NAME

SCHOOL

GRADE

**FOOD LABORATORY**  
**MODULE 4 – LET’S KNOW TRADITIONAL SICILIAN FOODS**

|                            |                                                                                                                                                                                                                                                                                                                                                                                                                                                                                                                                                 |
|----------------------------|-------------------------------------------------------------------------------------------------------------------------------------------------------------------------------------------------------------------------------------------------------------------------------------------------------------------------------------------------------------------------------------------------------------------------------------------------------------------------------------------------------------------------------------------------|
| <b>General objective</b>   | Promote knowledge and consumption of quality Sicilian agricultural foods, that are connected to the tradition and culture of the territory and that are obtained by respecting the environment.                                                                                                                                                                                                                                                                                                                                                 |
| <b>Specific objectives</b> | Know the Mediterranean Diet. Learn that Sicily is included in the Mediterranean Diet countries and has several typical genuine products.                                                                                                                                                                                                                                                                                                                                                                                                        |
| <b>Short introduction</b>  | Brief notes on the geography of the Mediterranean countries, and Sicily in particular. Typical foods of the Mediterranean Diet and the most common Sicilian agricultural products.                                                                                                                                                                                                                                                                                                                                                              |
| <b>Activity 1</b>          | Show to the children, and in some cases let them smell and touch, some of the agricultural Sicilian products (extra virgin olive oil, oranges, herbs, olives, almonds, cheeses, etc.).<br>Ask them to comment on the different smells, tastes, shapes, colours.<br>Ask them to indicate on a sheet the smile corresponding to the perception during the sensorial experience.<br>Blindfold the children, and let them smell and touch one food previously shown, asking them to identify the correct one. Mark on the sheet if they guessed it. |
| <b>Activity 2</b>          | Divide children in two teams. The operator should describe different characteristics of a typical Sicilian food and of the Mediterranean tradition, and the teams have to guess what food it is.                                                                                                                                                                                                                                                                                                                                                |
| <b>Activity 3</b>          | Make the children knead water and flour. Ask them to create shapes that represent Sicilian foods.                                                                                                                                                                                                                                                                                                                                                                                                                                               |
| <b>Activity 4</b>          | Prepare a sheet with different typical Sicilian and non-typical foods. Ask them to compose a meal by choosing the typical foods.                                                                                                                                                                                                                                                                                                                                                                                                                |

**EVALUATION**

Ask the children to draw (or paste) the food they recognised while they were blindfolded.  
Score = 1 point if they recognise it.

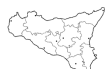

SCORE

Ask the children to draw (or paste) the food that was described by the teacher.  
Score = 1 point if they guess it.

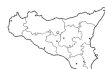

SCORE

Ask the children to draw (or paste) the food created with the dough of water and flour.  
Score = 1 point if they reproduce them correctly.

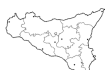

SCORE

Compose a typical Sicilian meal by choosing foods among those shown.  
Score = 1 point if they choose the correct foods.

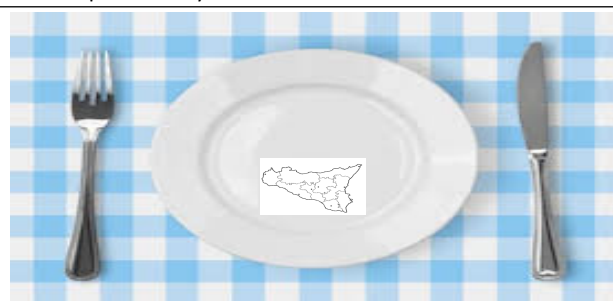

SCORE

**TOTAL SCORE**

SURNAME AND NAME

SCHOOL

GRADE

FOOD LABORATORY  
MODULE 5 – LET’S BUILD THE FOOD PYRAMID

|                     |                                                                                                                                                                                                                                                                                                   |
|---------------------|---------------------------------------------------------------------------------------------------------------------------------------------------------------------------------------------------------------------------------------------------------------------------------------------------|
| General objective   | Favour building healthy food habits.                                                                                                                                                                                                                                                              |
| Specific objectives | Know the different food groups and their suggested distribution in a day.<br>Know the food pyramid.                                                                                                                                                                                               |
| Short introduction  | Food classification. The daily meals. The food pyramid.                                                                                                                                                                                                                                           |
| Activity 1          | Prepare a sheet with the foods suitable for breakfast, morning/afternoon break, and lunch/dinner.<br>Ask the children to paint the foods suitable for each of the described meal.                                                                                                                 |
| Activity 2          | Prepare a blank poster and cut with a shape of triangle. Draw different lines for the levels of the pyramid.<br>Ask children to draw, paint and cut out a different food.<br>Create a path that leads each child to paste the food in the correct pyramid level, by respecting the pyramid rules. |

EVALUATION

Paint the foods suitable for breakfast.  
Score = 1 point if foods are painted correctly.

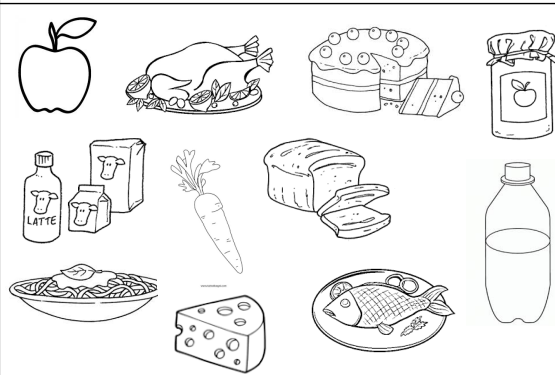

SCORE

Paint the foods suitable for lunch/dinner.  
Score = 1 point if foods are painted correctly.

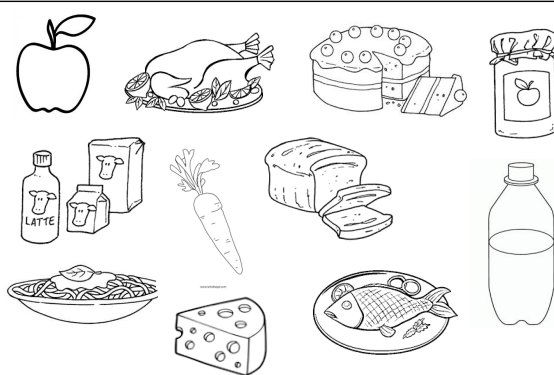

SCORE

Paint the foods suitable for the morning or afternoon break.  
Score = 1 point if foods are painted correctly.

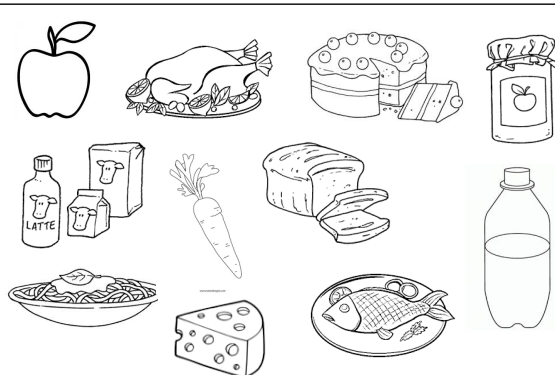

SCORE

Paste the food in the correct level, by respecting the pyramid rules.  
Score = 1 point if the food is pasted in the correct level.

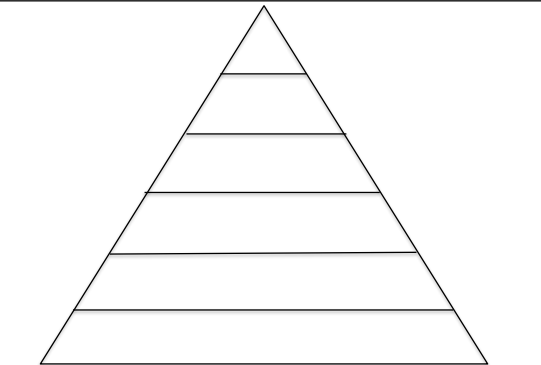

SCORE

TOTAL SCORE
